# Supplementary material
Source: PubMed Central journal article supplement (PMC5215974)
Supplement: NIHMS827236-supplement-2.pdf [file NIHMS827236-supplement-2.pdf]

**Supplemental Table 1. Expanded clones from YJK146 (CAG)<sub>140</sub> sequenced for repeat integrity.**

| <b>Clone</b> | <b>Repeats added</b> | <b>Forward repeats sequenced</b> | <b>Reverse repeats sequenced</b> | <b>Flanking forward ~330bp</b> | <b>Flanking reverse ~420bp</b> |
|--------------|----------------------|----------------------------------|----------------------------------|--------------------------------|--------------------------------|
| 1            | 73                   | 107                              | 127                              | +                              | +                              |
| 2            | 95                   | 148                              | 95                               | +                              | +                              |
| 3            | 27                   | 113                              | 109                              | +                              | +                              |
| 4            | 93                   | 174                              | 135                              | +                              | +                              |
| 5            | 142                  | 111                              | 147                              | +                              | +                              |
| 6            | 88                   | 81                               | 140                              | +                              | +                              |
| 7            | 70                   | 96                               | 113                              | +                              | +                              |
| 8            | 73                   | 82                               | 139                              | +                              | +                              |
| 9            | 145                  | 104                              | 117                              | +                              | +                              |
| 10           | 59                   | 77                               | 125                              | +                              | +                              |
| 11           | 91                   | 138                              | 182                              | +                              | +                              |
| 12           | 75                   | 168                              | 179                              | +                              | +                              |
| 13           | 77                   | 167                              | 148                              | +                              | +                              |
| 14           | 94                   | 171                              | 142                              | +                              | +                              |
| 15           | 101                  | 169                              | 158                              | +                              | +                              |
| 16           | 98                   | 194                              | 185                              | +                              | +                              |
| 17           | 62                   | 170                              | 146                              | +                              | +                              |
| 18           | 70                   | 137                              | 114                              | +                              | +                              |
| 19           | 98                   | 173                              | 141                              | +                              | +                              |
| 20           | 92                   | 175                              | 133                              | +                              | +                              |
| 21           | 88                   | 174                              | 131                              | +                              | +                              |

**Supplemental Table 2. Non-selective instability of YJK146 (CAG)<sub>140</sub> strain.**

| <i>Strain media</i>    | <b>Total PCRs</b> | <b>Expansions</b> |          | <b>Contractions</b> |          |
|------------------------|-------------------|-------------------|----------|---------------------|----------|
|                        |                   | <b>#</b>          | <b>%</b> | <b>#</b>            | <b>%</b> |
| <i>WT</i><br>glucose   | 95                | 1                 | 1.1      | 5                   | 5.3      |
| <i>WT</i><br>galactose | 143               | 1                 | 0.7      | 25                  | 17.5     |

3.3-fold difference in contraction frequency for (CAG)<sub>140</sub> grown on glucose compared to galactose; Fisher's exact test p-value 0.0153

**Supplemental Table 3. Primers used in this study.**

| Name             | Sequence                               | Notes                         |
|------------------|----------------------------------------|-------------------------------|
| JK109_CAG_NcoI   | agctccatggGCCGCCAGTGTGATGGATAGC        | CAG cloning                   |
| JK110_CAG_NotI   | agctgcggccgcGGCTTTTGCAAAAAGCTCTGCAGATC | CAG cloning                   |
| FlankL           | CCTTTGCCATTTATTGTCGC                   | CAG sequencing                |
| CanF             | TGCTTCTCCTCTATGTCGGC                   | CAG sequencing                |
| JK161_tetbal_fwd | agctccatggcctaggGCTACTTGGAGCCACTATCGAC | CAG spacer, no repeat cloning |
| JK162_T50_rev    | agctccatggcctaggGCTACTTGGAGCCACTATCGAC | CAG spacer cloning            |
| JK163_T100_rev   | agctccatggtaccGGACGGGTGTGGTCGCCATGAT   | CAG spacer cloning            |
| JK164_T150_rev   | agctccatggtaccTGTGGCGCCGGTGATGCCGGCC   | CAG spacer cloning            |
| JK165_T340_rev   | agctgcatgcggtaccCATCGGTCGACGCTCTCCCT   | No repeat cloning             |
| TrpS-F           | TCGATTTCTGACTGGGTTGGAAG                | Verify ChrIII integration     |
| 36a-R            | TAGCATACGTGTAATGATAGACGATTTTC          | Verify ChrIII integration     |
| A36b-F           | ACGTGTACAGTTCTCTTTACATCATC             | Verify ChrIII integration     |
| JK153_CAN140_fwd | GTGATGGATAGCAGCAGCAG                   | CAG repeat length             |
| JK171_CAG140_rev | GCATGCGGCTTTTGCAAAAAGCTC               | CAG repeat length             |
| JK316_CAG140_fwd | TAGTGGCTCCAAGTAGCCCTAG                 | CAG repeat length             |
| JK317_CAG140_rev | GTAGTAGGTTGAGGCCGTTGAG                 | CAG repeat length             |
| JK318_CAG140_fwd | CCGCACTGCTCCGAACAATC                   | CAG repeat length             |
| JK319_CAG140_rev | GAAGCAGCCCAGTAGTAGGTTG                 | CAG repeat length             |
| JK167_CAN1_fwd   | GGCCGCTCTAGAAGTAGTGGAT                 | CAN1 sequencing               |
| JK168_CAN1_rev   | CTCTTGGAACGGATTTTCTGG                  | CAN1 sequencing               |
| JK169_CAN1_fwd   | GTTTTAGCCATTATCGGGTTTC                 | CAN1 sequencing               |
| JK170_CAN1_rev   | AAGCTGCCTTTGTGTGCTTAAT                 | CAN1 sequencing               |
| ACT1 F           | CTCCACCACTGCTGAAAGAG                   | ChIP qPCR                     |
| ACT1 R           | GTGATGACTTGACCATCTGG                   | ChIP qPCR                     |
| 5' UAS 3 F       | CGGAAGAGCATTGACAAATATTGA               | ChIP qPCR                     |
| 5' UAS 3 R       | GGAAATAACAATGTCTGCGAGTG                | ChIP qPCR                     |
| T150 1900 F      | TAGTGGATCCCCGGGCTGC                    | ChIP qPCR                     |
| T150 2100 R      | CTCGAGGGGGGGCCCTCTCC                   | ChIP qPCR                     |

\* Primers for generating and confirming gene knockouts are available upon request.

**Supplemental Table 4. Strains used in this study.**

| Strain | Genotype                                                                                    | Background | Comments                                                |
|--------|---------------------------------------------------------------------------------------------|------------|---------------------------------------------------------|
| CH1585 | <i>MATa, leu2-Δ1, trp1-Δ63, ura3-52, his3-200</i>                                           |            | Shishkin <i>et al</i> , 2009                            |
| KS     | <i>bar1::HIS3, can1::KanMX</i>                                                              | CH1585     | Shah <i>et al</i> , 2014                                |
| YJK146 | <i>ChrIII(75594-75641)::UAS<sub>GAL</sub>-(CAG)<sub>140</sub>-P<sub>GAL</sub>-CAN1-TRP1</i> | KS         | Made with Swal cut pYes3-G4G1C1-Fori-CAG140-tetbal1-rev |
| YJK154 | <i>ChrIII(75594-75641)::UAS<sub>GAL</sub>-TET340-P<sub>GAL</sub>-CAN1-TRP1</i>              | KS         | Made with Swal cut pYes3-G4G1C1-Fori-tet340             |
| YJK156 | <i>ChrIII(75594-75641)::UAS<sub>GAL</sub>-(CAG)<sub>93</sub>-P<sub>GAL</sub>-CAN1-TRP1</i>  | KS         | Made with Swal cut pYes3-G4G1C1-Fori-CAG93-tetbal2-rev  |
| YJK159 | <i>srs2::HphMX4</i>                                                                         | YJK146     |                                                         |
| YJK161 | <i>rad5::HphMX4</i>                                                                         | YJK146     |                                                         |
| YJK162 | <i>rad52::HphMX4</i>                                                                        | YJK146     |                                                         |
| YJK189 | <i>sgs1::HphMX4</i>                                                                         | YJK146     |                                                         |
| YJK190 | <i>rad51::HphMX4</i>                                                                        | YJK146     |                                                         |
| YJK191 | <i>msh2::HphMX4</i>                                                                         | YJK146     |                                                         |
| YJK192 | <i>msh3::HphMX4</i>                                                                         | YJK146     |                                                         |
| YJK193 | <i>msh6::HphMX4</i>                                                                         | YJK146     |                                                         |
| YJK194 | <i>pol32::HphMX4</i>                                                                        | YJK146     |                                                         |
| YJK196 | <i>pif1::HphMX4</i>                                                                         | YJK146     |                                                         |
| YJK198 | <i>pif1-m2</i>                                                                              | YJK146     | Made using pVS31 (Schulz and Zakian, 1994)              |
| YJK199 | <i>pol30-89-LEU2</i>                                                                        | YJK146     | Made using pJH2480 (Lydeard <i>et al</i> , 2010)        |
| YJK200 | <i>mre11::HphMX4</i>                                                                        | YJK146     |                                                         |
| YJK202 | <i>mus81::HphMX4</i>                                                                        | YJK146     |                                                         |
| YJK221 | <i>rev3Δ</i>                                                                                | YJK146     | Made using pAM56 (Holbeck and Strathern, 1997)          |
| YJK228 | <i>yen1::NatMX4</i>                                                                         | YJK146     |                                                         |
| YJK229 | <i>mus81::HphMX4, yen1::NatMX4</i>                                                          | YJK202     |                                                         |

1. Shishkin, A. A. *et al*. Large-Scale Expansions of Friedreich's Ataxia GAA Repeats in Yeast. *Molecular Cell* **35**, 82–92 (2009).
2. Shah, K. A., McGinty, R. J., Egorova, V. I. & Mirkin, S. M. Coupling Transcriptional State to Large-Scale Repeat Expansions in Yeast. *Cell Reports* **9**, 1594–1602 (2014).
3. Schulz, V. P. & Zakian, V. A. The *Saccharomyces* PIF1 DNA helicase inhibits telomere elongation and de novo telomere formation. *Cell* **76**, 145–155 (1994).

4. Lydeard, J. R. *et al.* Break-induced replication requires all essential DNA replication factors except those specific for pre-RC assembly. *Genes & Development* **24**, 1133–1144 (2010).
5. Holbeck, S. L. & Strathern, J. N. A role for REV3 in mutagenesis during double-strand break repair in *Saccharomyces cerevisiae*. *Genetics* **147**, 1017–1024 (1997).
